# Supplementary material for: Macroporous Cell-Laden Gelatin/Hyaluronic Acid/Chondroitin Sulfate Cryogels for Engineered Tissue Constructs
Source: MDPI journal article supplement (doi:10.3390/gels8090590), 2022-09-16
Supplement: s1 [file s1]

# Macroporous Cell-Laden Gelatin/Hyaluronic Acid/Chondroitin Sulfate Cryogels for Engineered Tissue Constructs

Gulshakhar Kudaibergen <sup>1,\*</sup>, Madina Zhunussova <sup>1</sup>, Ellina A. Mun <sup>2</sup>, Yerlan Ramankulov <sup>1,2</sup> and Vyacheslav Ogay <sup>1</sup>

<sup>1</sup> Stem Cell Laboratory, National Center for Biotechnology, Nur-Sultan 010000, Kazakhstan

<sup>2</sup> School of Science and Humanities, Nazarbayev University, Nur-Sultan 010000, Kazakhstan

\* Correspondence: [kudaibergen@biocenter.kz](mailto:kudaibergen@biocenter.kz)

**Figure S1.** SEM images and histogram of pore sizes of the cryogels: (a-c) SEM images of cryogels: GelHACS-10 (a), GelHACS-25 (b), GelHACS-50 (c), scale bar = 100 $\mu$ m; (d-f) histogram of cryogels: GelHACS-10 (d), GelHACS-25 (e), GelHACS-50 (f).

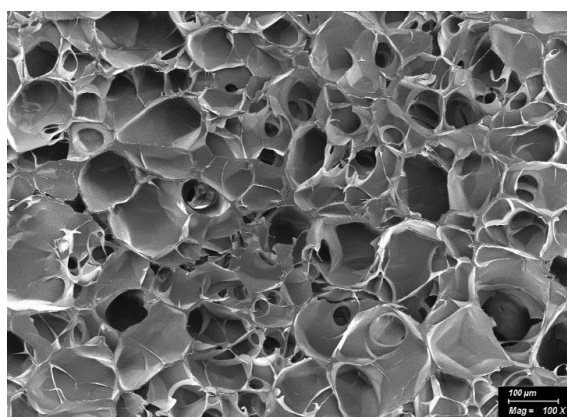

(a)

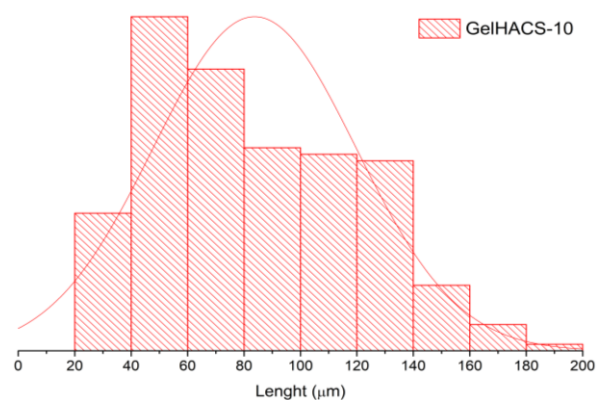

(d)

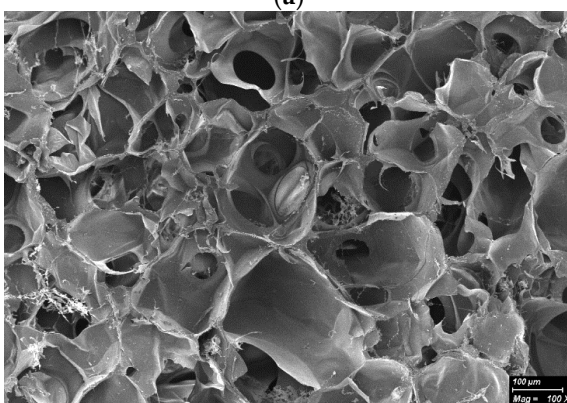

(b)

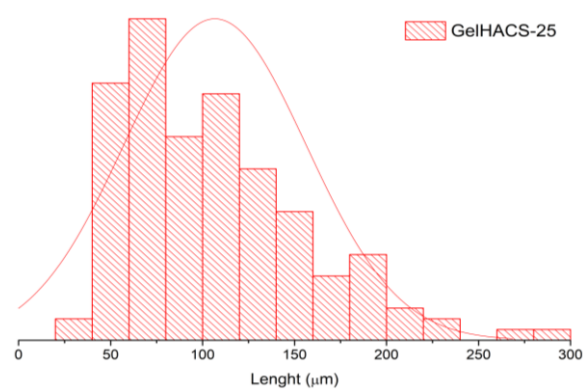

(e)

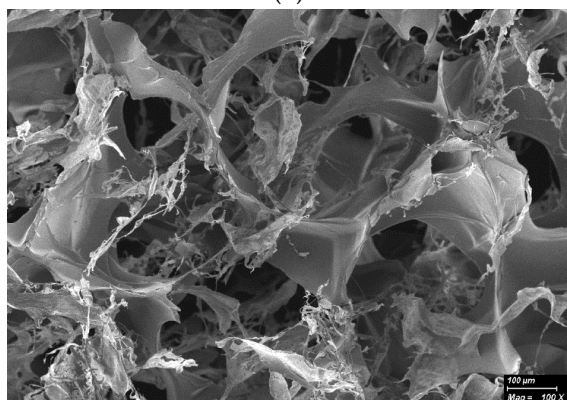

(c)

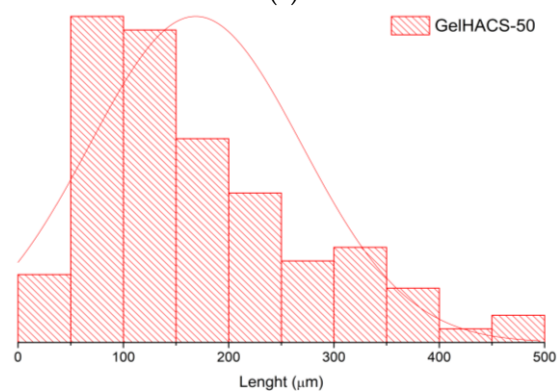

(f)
